# Supplementary material
Source: Springer Nature journal article supplement (https://www.springermedizin.de/resource/supplementary/12874_2005_135_MOESM3_ESM.pdf/9433844)

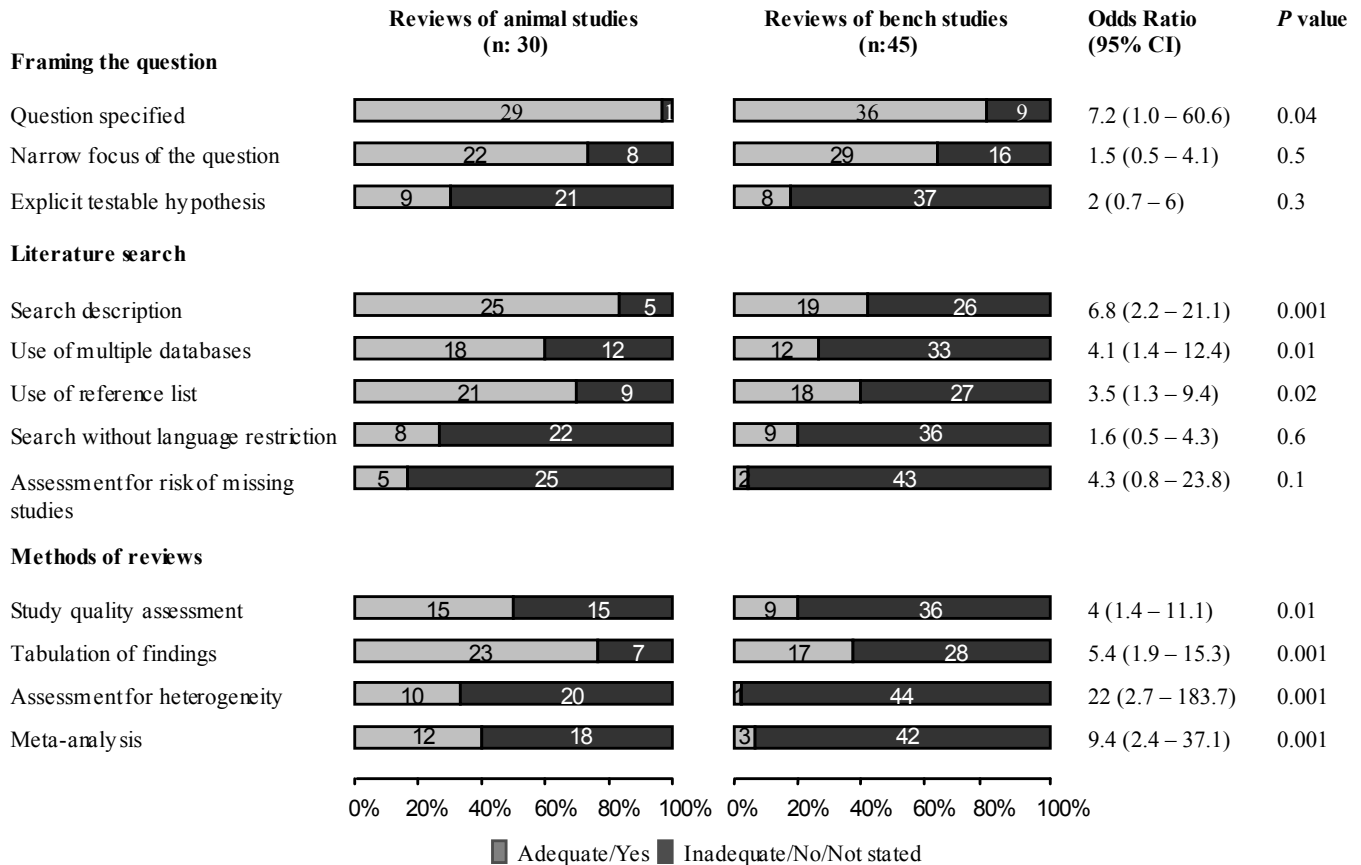

\* Data presented as 100% attached bars; figures in the stacks represent number of studies

Supplement: MOESM3 [file 9433844]
